# Supplementary material for: Functional interplay of DnaE polymerase, DnaG primase and DnaC helicase within a ternary complex, and primase to polymerase hand-off during lagging strand DNA replication in Bacillus subtilis
Source: PubMed Central journal article supplement — Nucleic Acids Res. 2013 Apr 5;41(10):5303–20. doi: 10.1093/nar/gkt207 (PMC3664799; doi:10.1093/nar/gkt207), 2013-04-05
Supplement: supp_gkt207_nar-00416-f-2013-File013.pdf [file supp_gkt207_nar-00416-f-2013-File013.pdf]

## Supplementary data

### **Functional interplay of DnaE polymerase, DnaG primase and DnaC helicase within a ternary complex, and primase to polymerase hand-off during lagging strand DNA replication in *Bacillus subtilis***

Olivier Rannou<sup>1</sup>, Emmanuelle Le Chatelier<sup>2</sup>, Marilynn A. Larson<sup>3</sup>, Hamid Nouri<sup>4</sup>, Bérangère Dalmais<sup>2@</sup>, Laughton Charles<sup>5</sup>, Laurent Jannièrè<sup>4</sup>, Panos Soultanas<sup>1,\*</sup>

<sup>1</sup>Centre for Biomolecular Sciences  
School of Chemistry, University Park, University of Nottingham  
Nottingham NG7 2RD, UK

<sup>2</sup>Laboratoire de Génétique Microbienne, MICALIS  
INRA, Domaine de Vilvert, F-78350 Jouy en Josas, France

<sup>3</sup>Department of Pathology and Microbiology,  
University of Nebraska Medical Center  
Omaha, NE 68198-5900, USA

<sup>4</sup>Epigenomics Project, iSSB, CNRS  
Genopole Campus 1, Genavenir 6, 5 rue Henri Desbruères,  
F-91030 Évry, France

<sup>5</sup>School of Pharmacy  
University Park, University of Nottingham  
Nottingham NG7 2RD, UK

@ Present laboratory:  
UMR1290 Biologie, gestion des risques en agriculture - Champignons pathogènes des plantes,  
INRA, RD 10 - Route de Saint-Cyr, F-78026 Versailles Cedex, France

**Running title:** *Functional insights into a ternary replication subcomplex*

\*Corresponding author:

Panos Soultanas, Tel.: (115) 9513525; Fax 00441158468002; Email; panos.soultanas @nottingham.ac.uk

**Key words;** Lagging strand replication; protein-protein interactions; replisome; *Bacillus subtilis*



<sup>a</sup> The proteins (full size or fragment derived thereof) fused to the binding (first lines) or activating (first column) domain of Gal4 are indicated. The fusions constructed here are indicated in red (details are available upon request). Remaining fusions were from the P. Noirot's collection (16 in the main text). AD- and BD- indicate empty pGBDU and pGAD vectors used to detect self-activation and as negative controls for interaction. The coordinates of the fragments cloned are indicated (in amino acids relative to the protein sequence). The line "autoactivation [3AT]" indicate behavior of pGBDU derived diploids onto plates selecting for the expression of the ADE2 and HIS3 interaction reporters: N, absence of autoactivation on either plates; Ax, autoactivation onto ADE selecting plates observed from day x; Hy, autoactivation onto HIS (or HIS + 3-aminotriazole) selecting plates observed from day y; [z]; concentration of 3-aminotriazole added to HIS selecting plates to reduce or eliminate autoactivation observed on this medium. Results are indicated as follow: -, no interaction; Ax Hy, interaction observed on ADE or HIS selecting plates at day x and y, respectively. Blue cells highlight interactions previously described (16 in the main text). Green ones indicate new interactions identified in this work. Red highlights previously described interactions not seen in this study. Yellow indicates inconsistent data and grey autoactivation or interaction presumably masked by early autoactivation.

**Table S2.** RNA, DNA, and RNA:DNA standards used in this study with the 5'-d(CTA)-containing 23-mer template 5'-d(CAGACACACACACACTACACACA)-C3. Ribonucleotides are italicized and underlined and the initial dinucleotide synthesized by DnaG primase is in bold.

| Oligonucleotide Standard | Length (bp) | Sequence (5' to 3')                   |
|--------------------------|-------------|---------------------------------------|
| RNA primer               | 16-mer      | <u><i><b>AG</b>UGUGUGUGUGUCUG</i></u> |
| RNA primer               | 14-mer      | <u><i><b>AG</b>UGUGUGUGUGUC</i></u>   |
| RNA primer               | 12-mer      | <u><i><b>AG</b>UGUGUGUGUG</i></u>     |
| RNA primer               | 10-mer      | <u><i><b>AG</b>UGUGUGUG</i></u>       |
| RNA primer               | 7-mer       | <u><i><b>AG</b>UGUGU</i></u>          |
| RNA primer               | 5-mer       | <u><i><b>AG</b>UGU</i></u>            |
| DNA primer               | 16-mer      | AGTGTGTGTGTGTCTG                      |
| DNA primer               | 15-mer      | GTGTGTGTGTGTCTG                       |
| DNA primer               | 14-mer      | TGTGTGTGTGTCTG                        |
| DNA primer               | 13-mer      | GTGTGTGTGTCTG                         |
| DNA primer               | 12-mer      | TGTGTGTGTCTG                          |
| DNA primer               | 11-mer      | GTGTGTGTCTG                           |
| DNA primer               | 10-mer      | TGTGTGTCTG                            |
| DNA primer               | 6-mer       | TGTCTG                                |
| RNA:DNA hybrid primer    | 16-mer      | <u><i><b>AG</b>TGTGTGTGTGTCTG</i></u> |
| RNA:DNA hybrid primer    | 16-mer      | <u><i><b>AGU</b>GTGTGTGTGTCTG</i></u> |

**Table S3.** Molecular modelling metrics

Workunit: P000002 Title:DnaG

1

603

**Model Summary:**
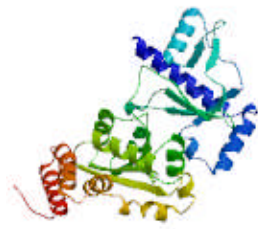
**Model information:**

 Modelled residue range: 112 to 426  
 Based on template: 3b39A (2.35 Å)

**Remark:** No search for template was performed. Only user specified template was used for modelling.

**Quaternary structure information:**

 Template (3b39): MONOMER  
 Model built: SINGLE CHAIN

**Ligand information:**

 Ligands in the template: DG: 1.  
 Ligands in the model: none.

 Sequence Identity [%]: 32.075  
 Evalue: 0

**Quality information:**

QMEAN Z-Score: -1.02

**Global Model Quality Estimation:**
**QMEAN4 global scores:**

QMEANscore4: Estimated absolute model quality:

Score components:

**Local scores:**

Coloring by residue error:

Residue error plot:

0.715

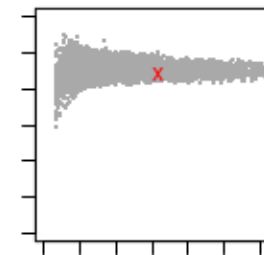

Z-Score: -1.02

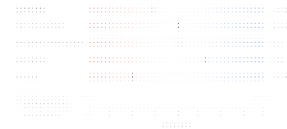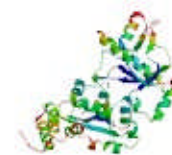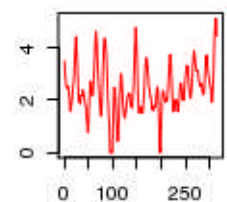
**QMEAN4 global scores:**

The QMEAN4 score is a composite score consisting of a linear combination of 4 statistical potential terms (estimated model reliability between 0-1). The pseudo-energies of the contributing terms are given below together with their Z-scores with respect to scores obtained for high-resolution experimental structures of similar size solved by X-ray crystallography:

| Scoring function term     | Raw score | Z-score |
|---------------------------|-----------|---------|
| C_beta interaction energy | -129.83   | 0.10    |
| All-atom pairwise energy  | -9529.60  | 0.21    |
| Solvation energy          | -45.93    | 1.38    |
| Torsion angle energy      | -49.56    | -1.96   |
| QMEAN4 score              | 0.715     | -1.02   |

If you publish results from QMEAN, please cite the following paper:

Benkert P, Biasini M, Schwede T. (2011). "Toward the estimation of the absolute quality of individual protein structure models." *Bioinformatics*, 27(3):343-50.

Local Model Quality Estimation:

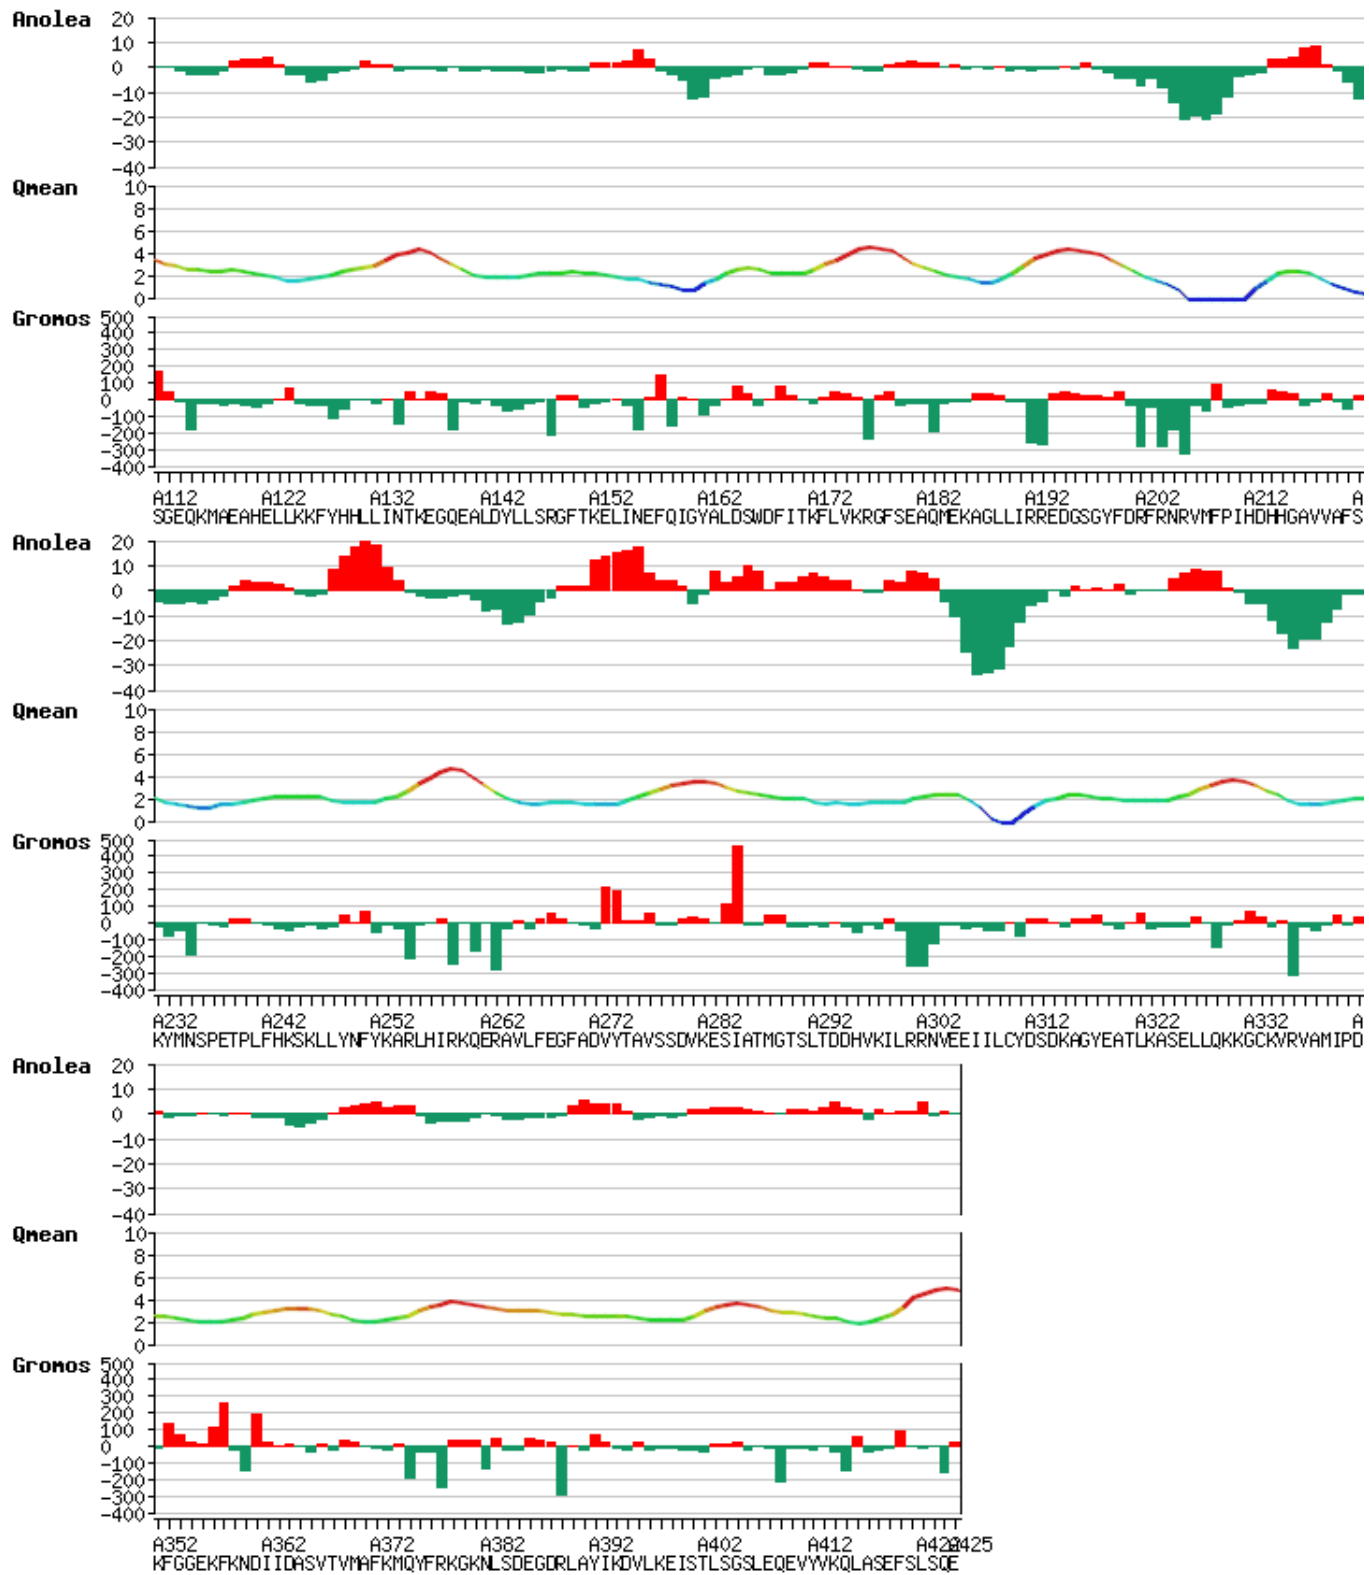

**Alignment:**

```
TARGET      1      SGEQKM AEAHELLKKF YHLLINTKE GQEALDYLLS RGFTKELINE
3b39A      109    na--hqrqtl yqlmdgIntf yqqsIq-qpV atsarqylek rglshfeviar

TARGET      hhhhh hhhhhhhhhh hhhh      hhhhhhhhhh h hhhhhh
3b39A      hhhhhh hhhhhhhhhh hhhhh      hhhhhhhhhh hhhhhh

TARGET      47      FQIGYALDSW DFITKFLVKR GFSEAQMEKA GLLIRREDGS GYFDRFRNRV
3b39A      156    faigfappgw dnvlkrfggn penrqslida gmlvtndrs- --ydrfrerv

TARGET      ssss   hhhhh   hhhhhhhhhh   sss       sss  sss
3b39A      h ssss   hhhhh   hhhhhhhhhh   sssss ss   sss  sss

TARGET      97      MFPIHDHGA VVAFSGRALG SQQPKYMNSP ETPLFHKSKL LYNFYKARLH
3b39A      205    mfpirdkrgr vigfggrvlG ndtpkylNsp etdifhkgrq lyglyeaqqd

TARGET      ssssss s ssssssss   sssss      hhhhhhh
3b39A      ssssss s ssssssss   sssss      hhh  h

TARGET      147     IRKQERAVLF EGFADVYAV SSDVKESIAT MGTSLTDDHV KILRRNVEEI
3b39A      255    naepnrllvV egymdvvala qyginyavas lgtsttadhi qlIfratnV

TARGET      ssss   hhhhhhh   sss       hhhh hhhhhh sss
3b39A      ssss   hhhhhhh   sss       hhhh hhhhhh sss

TARGET      197     ILCYSDKAG YEATLKASEL L---QKKGCK VRVAMIPDGL DPDDYIKKFG
3b39A      305    iccydgdrag rdaawcalet alpymtdgrq lrfmflpdge dpdtlvrkeg

TARGET      ssssss hhh hhhhhhhhhh   s ssssss   hhh
3b39A      ssssss hhh hhhhhhhhhh   hhh   s ssssss   hhh

TARGET      244     GEKFKNDIID ASVTVMAFKM QYFRKGK NLS DEGDRLAYIK DVLKEISTLS
3b39A      355    keafea-rme qamplsafIlf nslmpqvdlS tpdgrarlSt lalplisqVp

TARGET      hhhhh   ssshhhhh hhhhh   hhhhhhhhhh hhhhhhh
3b39A      hhhhhh hhh   ssshhhhh hhhhh   hhhhhhhhhh hhhhhhh

TARGET      294     GSLEQEVYVK QLASEFSLSQ ES -
3b39A      404    getlriylrq elgnklgild dsqI

TARGET      hhhhhhhhhh hhhhhh
3b39A      hhhhhhhhhh hhhhhh
```

**Modeling Log:**

```
3.70 (SP3)
Loading Template: 3b39A.pdb
Loading Raw Sequence
Loading Alignment: ./NXXX.align.submit.fasta
Removing HET groups from template structure
Refining Raw Sequence Alignment
```





#### Quaternary Structure Annotation of the Template

3b39 is annotated as MONOMER

The oligomeric state of the structure was assigned by the authors of the corresponding PDB entry

The following biological unit was used to build the template structure: 3b39.pdb1.gz

#### Quaternary Structure Modelling of the Target Protein

The target and template sequences are too diverse (seqid: 32.075) to infer a conservation of the oligomeric state

Please use the advanced features of the SwissModel Project Mode

The final model was calculated as single chain

#### Ligand Modeling Log: Template's ligands section

Ligands in the template: DG: 1. \_\_\_

The template contains ligands that are not yet part of the pipeline. Ligands which are currently assessed are listed in the help page.

No ligands were included in the model.

**References:** If you publish results using SWISS-MODEL, please cite the following papers:

- Arnold K., Bordoli L., Kopp J., and Schwede T. (2006). The SWISS-MODEL Workspace: A web-based environment for protein structure homology modeling. *Bioinformatics*, 22,195-201.
- Schwede T, Kopp J, Guex N, and Peitsch MC (2003) SWISS-MODEL: an automated protein homology-modeling server. *Nucleic Acids Research* 31: 3381-3385.
- Guex, N. and Peitsch, M. C. (1997) SWISS-MODEL and the Swiss-PdbViewer: An environment for comparative protein modeling. *Electrophoresis* 18: 2714-2723.

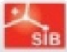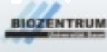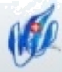

Workunit: P000029 Title: DnaE

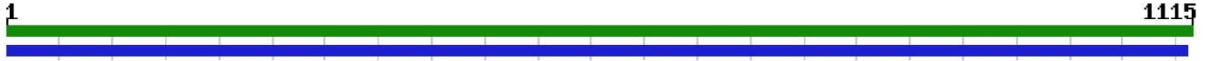

**Model Summary:**

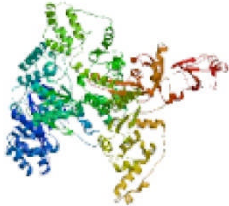

**Model information:**

Modelled residue range: 1 to 1111  
Based on template:

**Quaternary structure information:**

**Quality information:**

QMEAN Z-Score: -2.493

**Ligand information:**

**Global Model Quality Estimation:**

**QMEAN4 global scores:**

QMEANscore4: Estimated absolute model quality:

Score components:

**Local scores:**

Coloring by residue error:

Residue error plot:

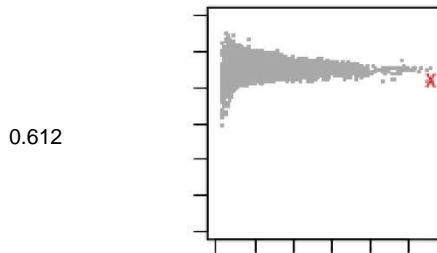

0.612

Z-Score: -2.493

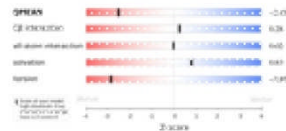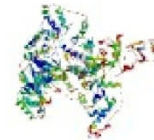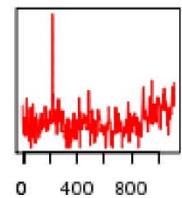

**QMEAN4 global scores:**

The QMEAN4 score is a composite score consisting of a linear combination of 4 statistical potential terms (estimated model reliability between 0-1). The pseudo-energies of the contributing terms are given below together with their Z-scores with respect to scores obtained for high-resolution experimental structures of similar size solved by X-ray crystallography:

| Scoring function term             | Raw score | Z-score |
|-----------------------------------|-----------|---------|
| C <sub>β</sub> interaction energy | -443.11   | 0.28    |
| All-atom pairwise energy          | -29032.21 | 0.02    |
| Solvation energy                  | -128.21   | 0.83    |
| Torsion angle energy              | -105.42   | -2.85   |
| QMEAN4 score                      | 0.612     | -2.49   |

If you publish results from QMEAN, please cite the following paper:

Benkert P, Biasini M, Schwede T. (2011). "Toward the estimation of the absolute quality of individual protein structure models." *Bioinformatics*, 27(3):343-50.

**Local Model Quality Estimation:**

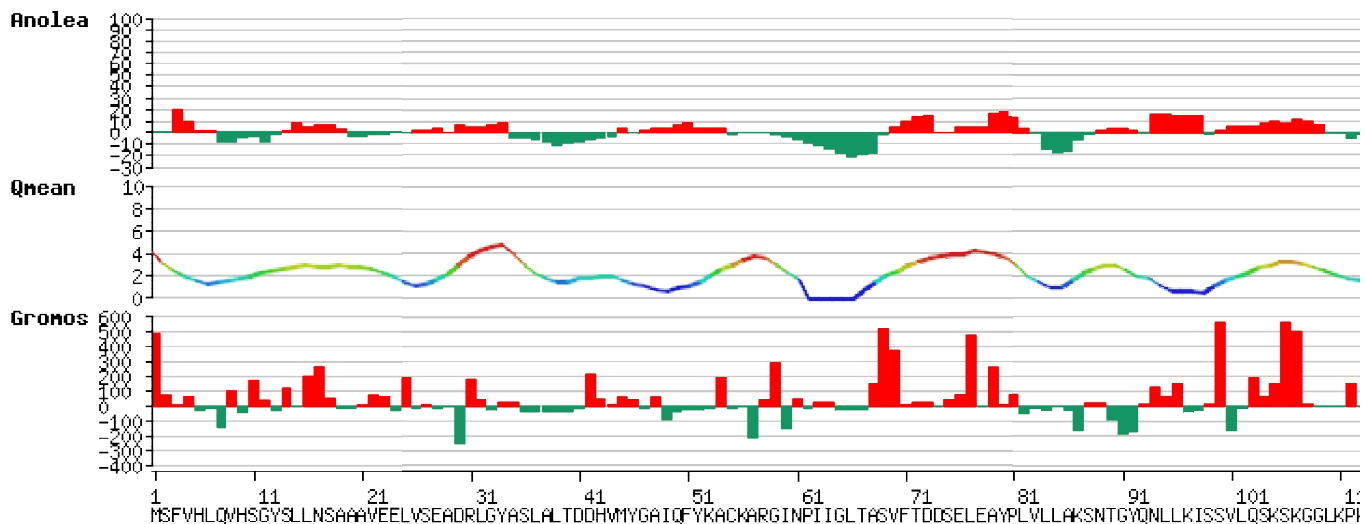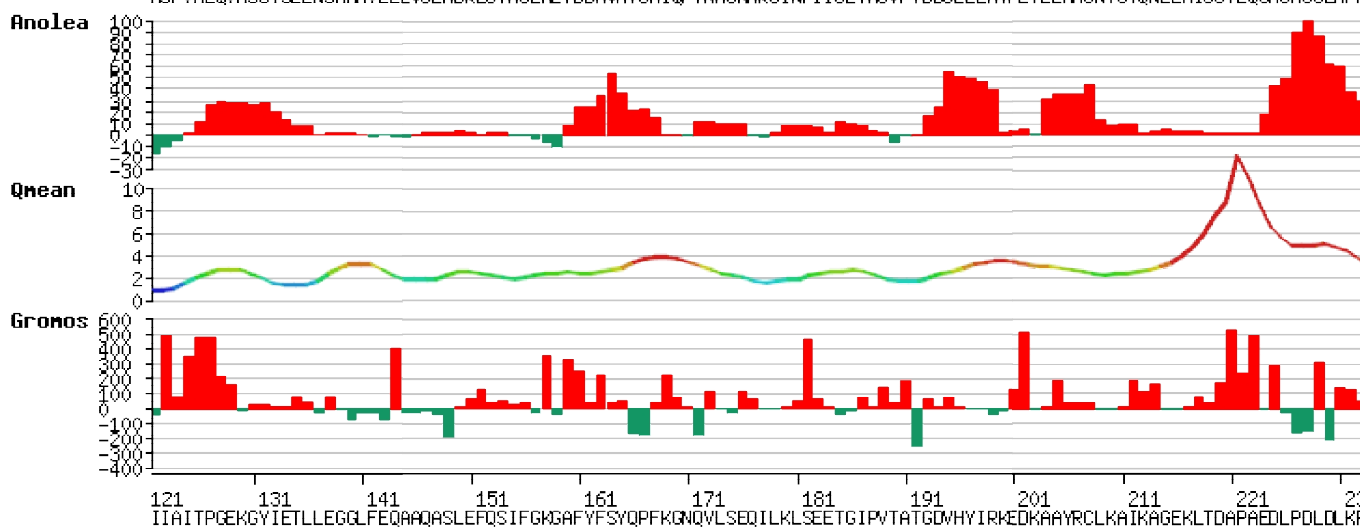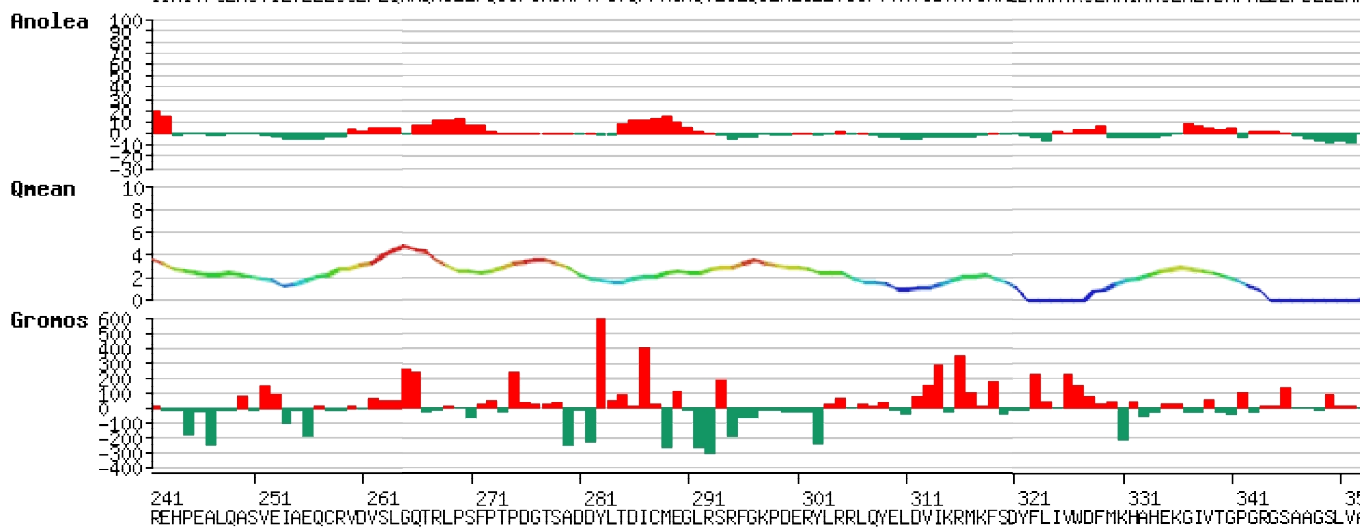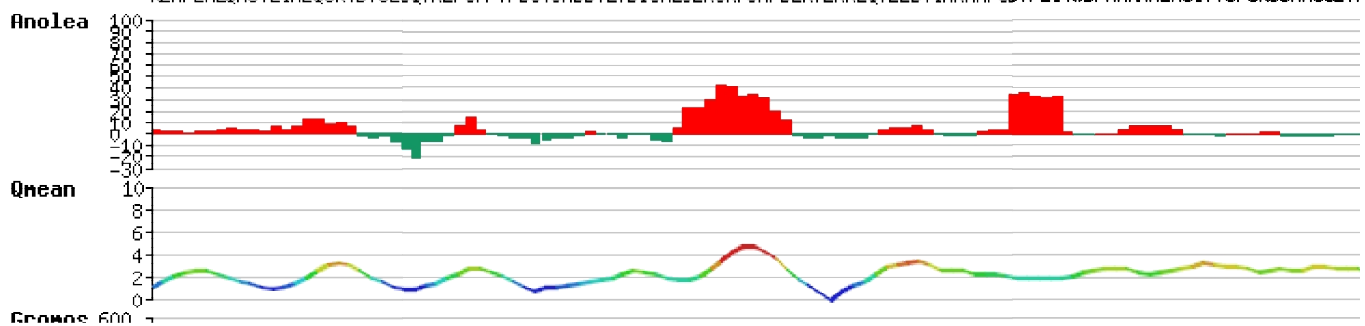

**Alignment:**

```

TARGET      1      MSFVHLQV HSGYSLNSA AAVEELVSEA DRLGY--ASL ALTDDHVMYG
3e0dA      5      lkfahlhq htqfslnga aklqdllkwv kettpedpal amtdhgnlfg

TARGET
3e0dA
                hhhhhhhh hhh      s      ssss
                hhhhhhhh hhh      sss  ssss      h

TARGET      47      AIQFYKACKA RGINPIIGLT ASVFTDDSEL E-----A YPLVLLAKSN
3e0dA      53      avefykkata mgvkiigye ayvaaesrfd rkrvg---y fhltllakdf
                ****

TARGET
3e0dA
                hhhhhhhh      sssssss s      sssssss h
                hhhhhhhh      sssssss sssss      s      s      sssssss h

TARGET      89      TGYQNLLKIS SVLQSKSK-- -GGLKPKWLH SYREGIIAIT PGEKGYIETL
3e0dA      104     tgyqnlvrta sraylegfye kpridreilr ehaqgliala gclgaeipqf

TARGET
3e0dA
                hhhhhhhhhh hhhhh      hhhhh h      sssssss      hhhhh
                hhhhhhhhhh hhhhh sss sss hhhhh h      sssssss      hhhhh

TARGET      136     LEGGLFEQAA QASLEFQSIF GKGFYFSYQ P-FKGNQVLS EQILKLSEET
3e0dA      154     ilqdrldlae arlnedlsif gdrffieiqn hglpeqkknv qvlkefarky

TARGET
3e0dA
                h      hhhhhh hhhhhhhhhh      sssssss      hhhhhh hhhhhhhhhh
                hh      hhhhh hhhhhhhhhh      sssssss      hhhhhh hhhhhhhhhh

TARGET      185     GIPVTATGDV HYIRKEDKAA YRCLKAIKAG EKLTDAPAED LPD--LDLKP
3e0dA      204     glgmvatnng hyvrkedara hevllaiqsk ttlddperwr fpcdefyvt

TARGET
3e0dA
                sss      hh hhh hhh
                sssss      hh hhhhhhhh

TARGET      233     LEEMQNIYRE HPE---ALQA SVEIAEQCRV DVSL---GQT RLPSFPTPDG
3e0dA      254     peemramlpe aewgdepfdn tveiarmcdv dlpigdkmvy riprflpg--

TARGET
3e0dA
                hhhhhhhh      h      hhhhhh
                hhhhhhhh      hhhhh hhhhhh

TARGET      277     TSADDYLTDI CMEGLRSRFG KP----- -----
3e0dA      304     rteaqylrel tflgllrryp driteafyre vlrllderal aealarveek

TARGET
3e0dA
                hhhhhhhh hhhhhhhh
                hhhhhhhh hhhhhhhh      hhhhhh hhh hhh hhhhh hh

TARGET      299     ----- -DERYLRLRQ YELDVIKRMK FSDYFLIVWD FMKHAHEKGI
3e0dA      361     aweelrkrew taeailhral yelsviermg fpgyflivqd yinwarghgv

TARGET
3e0dA
                hhhhhhhh hhhhhhhh      hhhhhhhh hhhhhhhh
                h      hhhhhhhh hhhhhhhh      hhhhhhhh hhhhhhhh

TARGET      338     VTGPGRGSAA GSLVAYVLYI TDVDPIKHHL LFERFLNPER VSMPDIDIDF
3e0dA      419     svgpgrgsaa gslvayavgi tnidplrfgl lferflnper vsmpdidtdf

```

|        |     |            |             |            |            |              |
|--------|-----|------------|-------------|------------|------------|--------------|
| TARGET |     | sss        | hhhhhhh     |            | hhh        | sss          |
| 3e0dA  |     | sss        | hhhhhhh     |            | hhh        | sss          |
| TARGET | 388 | PDTRRDEVIQ | YVQQKYGAMH  | VAQIITFGTL | AAKAALRDVG | RVFGVSPKEA   |
| 3e0dA  | 469 | sdrerdrviq | yvrerygedk  | vaqigtfgsl | askaalkdva | rvygiphkka   |
| TARGET |     | sh         | hhhhh       | hhhhh      | s ss       | sss          |
| 3e0dA  |     | shhhhhhhhh | hhhhh       | s ss       | sss        | sss          |
| TARGET | 438 | DQLAKLIPS- | -RPGMTLDEA  | RQQSPQLDKR | LRESSLLQQV | YSIARKIEGL   |
| 3e0dA  | 519 | eelaklipvq | fgkpkplqea  | feaepelrae | mekderirqv | ievamrlegl   |
| TARGET |     | hhhhh      |             |            | hh         | hhhhh hhhhhh |
| 3e0dA  |     | hhhhh      |             |            | hh         | hhhhh hhhhhh |
| TARGET | 486 | PRHASTHAAG | VVLSEEPLTD  | VVPLQEGHEG | IYLTQYAMDH | LEDLGLLKMD   |
| 3e0dA  | 569 | nrhasvhaag | vviaaepltd  | lvplmrdqeg | rpvtqydmg  | vealgllkmd   |
| TARGET |     | ss         | ss          | ssss       | sssss      | sssss        |
| 3e0dA  |     | ss         | sss         | ss         | ssss       | sssss        |
| TARGET | 536 | FLGLRNLTLI | ESITSMIEKE  | ENIKIDLSSI | SYSDDKTFSL | LSKGDTTGIF   |
| 3e0dA  | 619 | flglrtltfl | dearrivkes  | kgveldydrl | plddpktfel | lsrgetkgvf   |
| TARGET |     | ssss       | hhhhh       | hhhhhhhhhh |            | hhhhh hhh    |
| 3e0dA  |     | ssss       | hhhhh       | hhhhhhhhhh |            | hhhhh hhh    |
| TARGET | 586 | QLESAGMRVS | LKRLKPSGLE  | DIVAVNALYR | PGPMENIPLF | IDRKHGRAPV   |
| 3e0dA  | 669 | qlesggmtat | vrglkiprrle | diialvslyr | pgpmehipty | irrhgqepv    |
| TARGET |     | hhhhh      | hhhh        | h hhhhhhhh | hhhhhhh    | hhhh         |
| 3e0dA  |     | hhhhh      | hhhh        | h hhhhhhhh | h          | hhh hhhh     |
| TARGET | 636 | HY---PHED- | -LRSILEDTY  | GVIVYQEIM  | MIASRMAGFS | LGEADLLRRA   |
| 3e0dA  | 719 | syafphaek  | ylrpildety  | gipvyqeqim | qiasqvagys | lgeadllrra   |
| TARGET |     |            | h           | hhhh       | hhhhhhh    | hhhhhhhhhh   |
| 3e0dA  |     | hhhhh      | hhhh        | hhhh       | hhhhhhh    | hhhhhhhhhh   |
| TARGET | 681 | VSKKKKEILD | RERSHFVEGC  | LKKEYSVDTA | NEVYDLIVKF | ANYGFNRSHA   |
| 3e0dA  | 769 | mgkkrveemq | khrrerfvrga | kegvpeeea  | nrlfdmleaf | anygfnksha   |
| TARGET |     | hhh        | hh          | hhhhhhhhhh | hhh        | hhh          |
| 3e0dA  |     | hhh        | hh          | hhhhhhhhhh | hhh        | hhh          |
| TARGET | 731 | VAYSMIGCQL | AYLKAHYPLY  | FMCGLLTSVI | GNEKDISQYL | YEAKGSGIRI   |
| 3e0dA  | 819 | aaysllsyqt | ayvkahypve  | fmaallsver | hdsdkvaeyi | rdaralgipv   |
| TARGET |     | hhhhhhhhhh | hhhhh       | hh hhhhhh  | hhhhhhh    | hhhh         |
| 3e0dA  |     | hhhhhhhhhh | hhhhh       | hh hhhhhh  | hhhhhhh    | hhhh         |
| TARGET | 781 | LPPSVNKSSF | PFTVENGSVR  | YSLRAIKSVG | VSAVKDIYKA | -RKEKPFEDL   |
| 3e0dA  | 869 | lppdvnrsgf | dfkvvgeeil  | fglsavknvg | emaarailee | rerggpfksl   |

|        |      |            |            |            |            |               |           |
|--------|------|------------|------------|------------|------------|---------------|-----------|
| TARGET |      | s          | sss        | sss        | s          | hhhhhhh       | h         |
| 3e0dA  |      | s          | sss        | sss        | s          | hhhhhhhhh hhh | h         |
|        |      |            |            |            |            |               |           |
| TARGET | 830  | FDFCFRVPSK | SVNRKMLEAL | IFSGAMDEFG | QNRATLLASI | DVALEHAELF    |           |
| 3e0dA  | 919  | gdfkrlrpeq | vnkralesl  | vkagaldafg | -drarllasl | epllrwaet     |           |
|        |      |            |            |            |            |               |           |
| TARGET |      | hhhhhh     | hhhhhhh    | hh         | hhhhhhh    | hhhhhhhhh     |           |
| 3e0dA  |      | hhhhhh     | hhhhhhh    | hh         | hhhhhhh    | hhhhhhhhh     |           |
|        |      |            |            |            |            |               |           |
| TARGET | 880  | AAD--DDQMG | LFLDESFSIK | PKYVETEELP | LVDLLAFEKE | TLGIYFSNHP    |           |
| 3e0dA  | 968  | rerrgrsglv | lfaeve---e | pplveaspld | eitmlryeke | algiyvsgph    |           |
|        |      |            |            |            |            |               |           |
| TARGET |      | hh         |            |            | hhhhhhhhh  | h             |           |
| 3e0dA  |      | hhh        |            |            | hhhhhhhhh  | h             |           |
|        |      |            |            |            |            |               |           |
| TARGET | 928  | LSAFR----K | QLTAQGAVSI | LQAQRAVKRQ | LSLGVLLSKI | KTIRTKTGQN    |           |
| 3e0dA  | 1015 | vlrypglrev | asctieelse | fvrelpgkpk | vllsgmveev | rf-----       |           |
|        |      |            |            |            |            |               |           |
| TARGET |      |            | hhhh       | hh         | ss         | ssssssssss    | ss        |
| 3e0dA  |      | hhhhh      | hhhh       | hh         | ss         | ssssssss      | s         |
|        |      |            |            |            |            |               |           |
| TARGET | 974  | MAFLTLSDET | GEMEAUVFPE | QFRQLSPVLR | EGALLFTAGK | CEVRQDKIQF    |           |
| 3e0dA  | 1069 | ----tldet  | galevvk--- | -----      | edipllvlae | verv-----l    |           |
|        |      |            |            |            |            |               |           |
| TARGET |      | ssssssss   | sss        | hhhhhh     | hhh        | ssssss        | s         |
| 3e0dA  |      | ssss       | sssss      |            |            | ssssss        | s         |
|        |      |            |            |            |            |               |           |
| TARGET | 1024 | IMSRAELLED | MDAEKAPSVY | IKIESSQHSQ | EILAKIKRIL | LEHKGETGVY    |           |
| 3e0dA  | 1115 | aqavwtleev | leapka--le | vevdhalde  | kga-rlksll | dehpgslpvy    |           |
|        |      |            |            |            |            |               |           |
| TARGET |      | sssss      | hhh        | sss        | sss        | hhhhh         | h sss ss  |
| 3e0dA  |      | sssss      | hh         | sss        | ss         | sssss         | h sss sss |
|        |      |            |            |            |            |               |           |
| TARGET | 1074 | LYYERQKQ-T | IKLPESFHIN | ADHQVLY--- | -RLKELLGQK | NVV           |           |
| 3e0dA  | 1163 | lrvlgpfgea | lfalrevrv  | eealgileae | gyraylvpdr | evf-          |           |
|        |      |            |            |            |            |               |           |
| TARGET |      | sss        | s ssss     | sss        | hhhh       | sss           |           |
| 3e0dA  |      | sssss      | sss ssss   | sss        | hhhhhh     | sssssss       |           |

**Modeling Log:**

```

3.70 (SP3)
Loading Template: 3e0dA.pdb
Loading Raw Sequence
Loading Alignment: ./user.align.submit.fasta.FF
Removing HET groups from template structure
Refining Raw Sequence Alignment
ProModII: doing simple assignment of backbone
C-terminal overhang trimmed for chain ' '. End at residue: 1111
ProModII: adding blocking groups
Adding Missing
Sidechains AddPolar H

```

```

BuildDeletedLoopsModel
Trying Ligating with anchor residues GLY 32 and SER 35
Number of Ligations found: 16
ACCEPTING loop 2: clash= 0 FF= -53.9 PP= 0.00
Trying Ligating with anchor residues LEU 76 and TYR 79
Trying Ligating with anchor residues GLU 75 and TYR 79
Trying Ligating with anchor residues SER 74 and TYR 79
Number of Ligations found: 16
all loops are bad; continuing CSP with larger segment
Trying Ligating with anchor residues ASP 73 and TYR 79
Number of Ligations found: 63
all loops are bad; continuing CSP with larger segment
Trying Ligating with anchor residues ASP 72 and TYR 79
Number of Ligations found: 210
all loops are bad; continuing CSP with larger segment
Trying Ligating with anchor residues ASP 72 and PRO 80
Number of Ligations found: 500
ACCEPTING loop 326: clash= 0 FF= -19.6 PP= 1.00
Trying Ligating with anchor residues SER 105 and GLY 108
Number of Ligations found: 11
all loops are bad; continuing CSP with larger segment
Trying Ligating with anchor residues LYS 104 and GLY 108
Number of Ligations found: 50
ACCEPTING loop 0: clash= 0 FF= 839.1 PP= -3.00
Small Ligation (C-N <3.0A) ignored;
GROMOS will repair it at residue PHE 168
Trying Ligating with anchor residues PRO 226 and ASP 229
Trying Ligating with anchor residues LEU 225 and ASP 229
Number of Ligations found: 30
all loops are bad; continuing CSP with larger segment
Trying Ligating with anchor residues LEU 225 and LEU 230
Number of Ligations found: 80
all loops are bad; continuing CSP with larger segment
Trying Ligating with anchor residues ASP 224 and LEU 230
Number of Ligations found: 500
all loops are bad; continuing CSP with larger segment
Trying Ligating with anchor residues ASP 224 and LYS 231
Number of Ligations found: 500
all loops are bad; continuing CSP with larger segment
Trying Ligating with anchor residues GLU 223 and LYS 231
Number of Ligations found: 500
all loops are bad; continuing CSP with larger segment
Trying Ligating with anchor residues GLU 223 and PRO 232
Number of Ligations found: 500
all loops are bad; continuing CSP with larger segment
Trying Ligating with anchor residues ALA 222 and PRO 232
Number of Ligations found: 500
all loops are bad; continuing CSP with larger segment
+++ Warning: Ligation Failed, SparePart will be inserted later
+++ It is usually the sign that the region is misaligned.
Trying Ligating with anchor residues PRO 244 and LEU 247
Trying Ligating with anchor residues HIS 243 and LEU 247
Trying Ligating with anchor residues GLU 242 and LEU 247
Number of Ligations found: 88
ACCEPTING loop 74: clash= 0 FF= 474.7 PP= -2.00
Trying Ligating with anchor residues SER 262 and GLN 265
Number of Ligations found: 15
ACCEPTING loop 14: clash= 0 FF= 450.0 PP= 0.00
connectivity problem (C-N > 3.0A) at residue: 275
Trying Ligating with anchor residues PRO 272 and ASP 275
Trying Ligating with anchor residues PRO 272 and GLY 276
Trying Ligating with anchor residues PRO 272 and THR 277
Number of Ligations found: 500
ACCEPTING loop 188: clash= 0 FF= -52.9 PP= -2.00
Trying Ligating with anchor residues LYS 297 and GLU 300
Trying Ligating with anchor residues GLY 296 and GLU 300
Trying Ligating with anchor residues PHE 295 and GLU 300
Number of Ligations found: 287

```



```

ACCEPTING loop 24: clash= 0 FF= 267.3 PP= -2.00
Trying Ligating with anchor residues PRO 445 and PRO 448
Number of Ligations found: 5
ACCEPTING loop 1: clash= 0 FF= 20.3 PP= 0.00
connectivity problem (C-N >3.0A) at residue: 494
Trying Ligating with anchor residues THR 491 and ALA 494
Number of Ligations found: 10
all loops are bad; continuing CSP with larger segment
Trying Ligating with anchor residues SER 490 and ALA 494
Number of Ligations found: 65
ACCEPTING loop 37: clash= 0 FF= -160.4 PP= -1.00
Trying Ligating with anchor residues HIS 636 and HIS 639
Trying Ligating with anchor residues VAL 635 and HIS 639
Trying Ligating with anchor residues VAL 635 and GLU 640
Number of Ligations found: 422
ACCEPTING loop 54: clash= 0 FF= 134.2 PP= 0.00
Trying Ligating with anchor residues GLU 640 and ARG 643
Number of Ligations found: 7
all loops are bad; continuing CSP with larger segment
Trying Ligating with anchor residues HIS 639 and ARG 643
Trying Ligating with anchor residues PRO 638 and ARG 643
Number of Ligations found: 362
ACCEPTING loop 282: clash= 0 FF= -105.6 PP= 0.00
Trying Ligating with anchor residues ALA 820 and GLU 823
Trying Ligating with anchor residues ALA 820 and LYS 824
Number of Ligations found: 100
ACCEPTING loop 99: clash= 0 FF= -379.6 PP= -2.00
Trying Ligating with anchor residues ASP 882 and GLN 885
Number of Ligations found: 10
ACCEPTING loop 0: clash= 0 FF= 1880.1 PP= -4.00
Trying Ligating with anchor residues PHE 931 and GLN 934
Trying Ligating with anchor residues ALA 930 and GLN 934
Trying Ligating with anchor residues ALA 930 and LEU 935
Trying Ligating with anchor residues SER 929 and LEU 935
Number of Ligations found: 180
ACCEPTING loop 60: clash= 0 FF= -139.2 PP= -2.00
connectivity problem (C-N >3.0A) at residue: 965
Trying Ligating with anchor residues LYS 962 and THR 965
connectivity problem --> including residue THR 966
Trying Ligating with anchor residues LYS 962 and ILE 966
Trying Ligating with anchor residues LYS 962 and ARG 967
Trying Ligating with anchor residues LYS 962 and THR 968
Trying Ligating with anchor residues LYS 962 and LYS 969
Trying Ligating with anchor residues LYS 962 and THR 970
Trying Ligating with anchor residues LYS 962 and GLY 971
Trying Ligating with anchor residues LYS 962 and GLN 972
+++ Warning: Ligation Failed, SparePart will be inserted later
+++ It is usually the sign that the region is misaligned.
connectivity problem (C-N > 3.0A) at residue: 991
Trying Ligating with anchor residues ALA 988 and PHE 991
Trying Ligating with anchor residues ALA 988 and PRO 992
Trying Ligating with anchor residues ALA 988 and GLU 993
Trying Ligating with anchor residues ALA 988 and GLN 994
Trying Ligating with anchor residues ALA 988 and PHE 995
Trying Ligating with anchor residues ALA 988 and ARG 996
Trying Ligating with anchor residues ALA 988 and GLN 997
Trying Ligating with anchor residues ALA 988 and LEU 998
+++ Warning: Ligation Failed, SparePart will be inserted later
+++ It is usually the sign that the region is misaligned.
connectivity problem (C-N > 3.0A) at residue: 1017
Trying Ligating with anchor residues GLU 1015 and GLN 1018
Trying Ligating with anchor residues GLU 1015 and ASP 1019
Trying Ligating with anchor residues GLU 1015 and LYS 1020
Trying Ligating with anchor residues GLU 1015 and ILE 1021
Trying Ligating with anchor residues GLU 1015 and GLN 1022
Trying Ligating with anchor residues GLU 1015 and PHE 1023
Number of Ligations found: 500
ACCEPTING loop 424: clash= 0 FF= 1384.0 PP= -3.00

```

```

connectivity problem (C-N >3.0A) at residue: 1057
Trying Ligating with anchor residues GLU 1054 and ALA 1057
Trying Ligating with anchor residues GLU 1054 and LYS 1058
Number of Ligations found: 1
ACCEPTING loop 0: clash= 0 FF= 65.0 PP= -2.00
Trying Ligating with anchor residues GLN 1079 and THR 1082
Trying Ligating with anchor residues ARG 1078 and THR 1082
Number of Ligations found: 2
all loops are bad; continuing CSP with larger segment
Trying Ligating with anchor residues GLU 1077 and THR 1082
Number of Ligations found: 61
ACCEPTING loop 50: clash= 0 FF= 75.5 PP= 0.00
Trying Ligating with anchor residues LEU 1098 and LEU 1101
Trying Ligating with anchor residues VAL 1097 and LEU 1101
Trying Ligating with anchor residues VAL 1097 and LYS 1102
Number of Ligations found: 130
ACCEPTING loop 58: clash= 0 FF= 1607.8 PP= 1.00
Building CSP loop with anchor residues GLY 859 and ARG 862
Number of Ligations found: 4
ACCEPTING loop 2: clash= 0 FF= -155.6 PP= -1.00
Building CSP loop with anchor residues SER 893 and LYS 897
Building CSP loop with anchor residues GLU 892 and LYS 897
Number of Ligations found: 36
ACCEPTING loop 26: clash= 0 FF= 1153.3 PP= 0.00
Building CSP loop with anchor residues ALA 1039 and VAL 1042
Building CSP loop with anchor residues LYS 1038 and VAL 1042
Building CSP loop with anchor residues LYS 1038 and TYR 1043
Number of Ligations found: 46
all loops are bad; continuing CSP with larger segment
Building CSP loop with anchor residues GLU 1037 and TYR 1043
Number of Ligations found: 81
ACCEPTING loop 25: clash= 0 FF= 856.6 PP= 2.00
Finding Spare-Part loop with anchor residues ALA 220 and LYS 231
all loops are bad; continuing scan with larger segment
Finding Spare-Part loop with anchor residues ASP 219 and LYS 231
ACCEPTING loop 4from 2BBKH Clash= 4 FF= 505.1 PP=2027.12
BadPhi= 2 BadGX= 0 BadXP= 1 weakXP= 1 Score=8.75 rms= 0.00
Finding Spare-Part loop with anchor residues SER 961 and THR 978
ACCEPTING loop 39from 3DFR_ Clash= 4 FF= 255.3 PP=2009.60
BadPhi= 0 BadGX= 0 BadXP= 0 weakXP= 0 Score=6.00 rms= 0.00
Finding Spare-Part loop with anchor residues GLU 987 and GLU 1004
ACCEPTING loop 81from 3SDHA Clash= 7 FF= 219.8 PP=2107.56
BadPhi= 0 BadGX= 0 BadXP= 0 weakXP= 0 Score=10.50 rms= 0.00
Optimizing Sidechains
Adding Hydrogens
Optimizing loops and OXT (nb = 123)
Final Total Energy: 87564.758 KJ/mol
Dumping Sequence Alignment

```

### Template Selection Log:

### Ligand Modeling Log:

**References:** If you publish results using SWISS-MODEL, please cite the following papers:

- Arnold K., Bordoli L., Kopp J., and Schwede T. (2006). The SWISS-MODEL Workspace: A web-based environment for protein structure homology modeling. *Bioinformatics*, 22,195-201.

- Schwede T, Kopp J, Guex N, and Peitsch MC (2003) SWISS-MODEL: an automated protein homology-modeling server. *Nucleic Acids Research* 31: 3381-3385.
- Guex, N. and Peitsch, M. C. (1997) SWISS-MODEL and the Swiss-PdbViewer: An environment for comparative protein modeling. *Electrophoresis* 18: 2714-2723.

### Supplementary Figure 1S

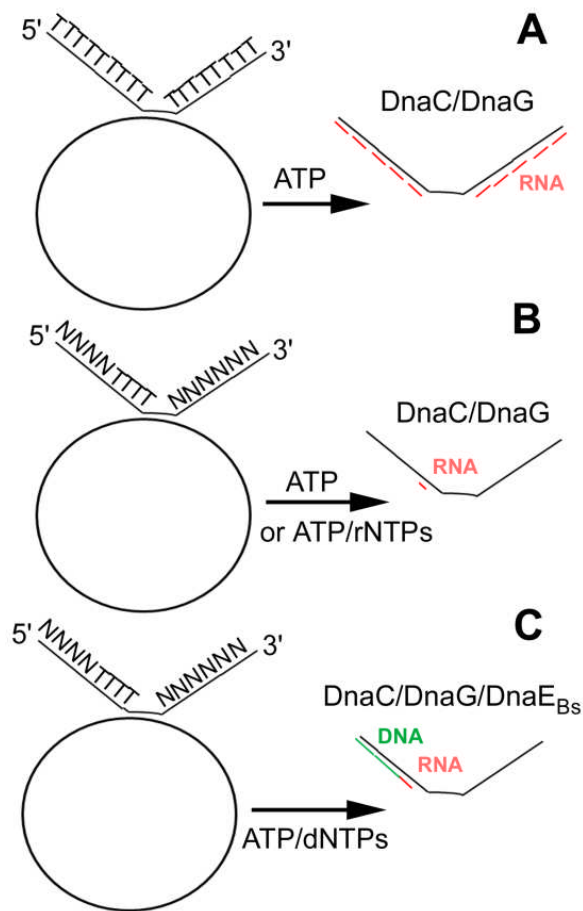

**Supplementary Figure 1s.** Coupled helicase-primase and helicase-primase-polymerase assays.

**A.** A schematic diagram explaining the basis of the coupled helicase-primase assay using a forked DNA substrate with polyT tails. Since 5'-d(TTT) is a starting prime site for the *B. subtilis* DnaG multiple RNA primers (shown in red) will be formed along both 5'- and 3'-tails and the displaced oligonucleotide will be shifted in non-denaturing polyacrylamide gels. ATP will provide the energy fuel for the translocating helicase and the substrate for the primase to synthesize poly(A) RNA primers.

**B.** The same assay was carried out with a forked DNA substrate with random sequences in the tails but possessing a single 5'-d(TTTT) site along the 5'-tail (see EXPERIMENTAL PROCEDURES in the main text). In the presence of ATP or ATP+rNTPs only a small amount of small RNA primers will be synthesized which are not sufficient to cause a shift of the displaced oligonucleotide.

**C.** A schematic diagram explaining the basis of the coupled helicase-primase-polymerase assay The same assay as that described in panel B was carried out in the presence of ATP+dNTPs and DnaE<sub>Bs</sub>. This time a clear shift of the displaced oligonucleotide was observed as the small RNA primers were extended further by DnaE<sub>Bs</sub> to produce larger RNA-DNA hybrids (Red-Green) that annealed onto the displaced oligonucleotide.
